# Supplementary material for: Structural plasticity of green fluorescent protein to amino acid deletions and fluorescence rescue by folding-enhancing mutations
Source: PubMed Central journal article supplement (PMC4513630; doi:10.1186/s12858-015-0046-5), 2015-07-25
Supplement: 12858_2015_46_MOESM1_ESM.pdf [file 12858_2015_46_MOESM1_ESM.pdf]

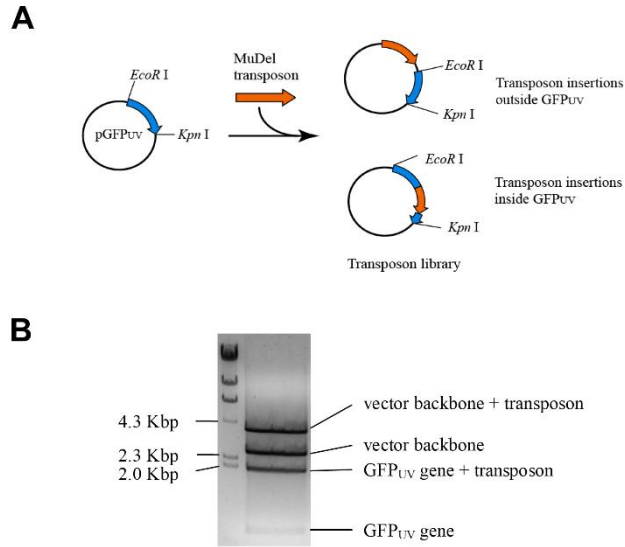

**Figure S1.** Isolation of transposon inserts inside GFP<sub>UV</sub> gene. **A)** Possible outcome of transposon insertion. **B)** A 1% agarose gel showing the product from *EcoR* I/*Kpn* I digestion of pGFP<sub>UV</sub>-transposon library. Transposon inserts inside GFP<sub>UV</sub> gene can be recovered by re-ligating the DNA bands corresponding to “vector backbone” and “GFP<sub>UV</sub> gene + transposon”.
