# Supplementary material for: Structural plasticity of green fluorescent protein to amino acid deletions and fluorescence rescue by folding-enhancing mutations
Source: PubMed Central journal article supplement (PMC4513630; doi:10.1186/s12858-015-0046-5), 2015-07-25
Supplement: 12858_2015_46_MOESM2_ESM.pdf [file 12858_2015_46_MOESM2_ESM.pdf]

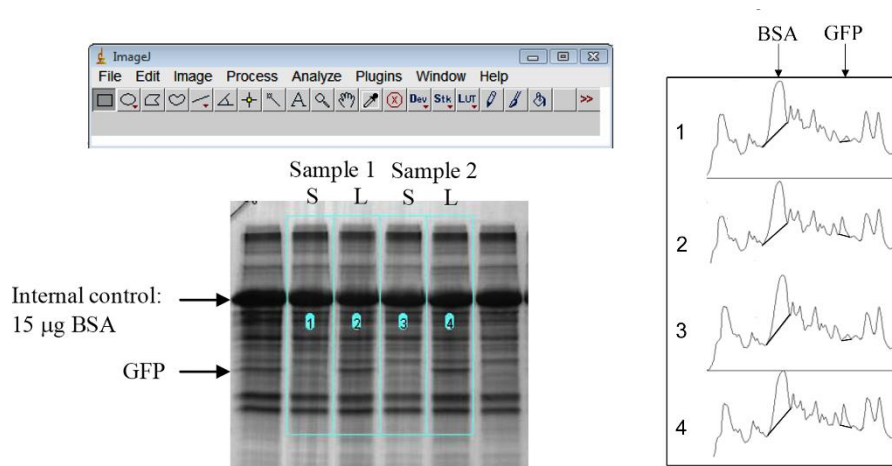

**Figure S2.** Quantification of the soluble fraction of GFP<sub>UV</sub> in whole cell lysis using Image J. Bovine serum albumin (BSA, 15 μg) is used as an internal control. S: supernant; L: crude cell lysis.
