# Supplementary material for: Structural plasticity of green fluorescent protein to amino acid deletions and fluorescence rescue by folding-enhancing mutations
Source: PubMed Central journal article supplement (PMC4513630; doi:10.1186/s12858-015-0046-5), 2015-07-25
Supplement: 12858_2015_46_MOESM3_ESM.pdf [file 12858_2015_46_MOESM3_ESM.pdf]

**Table S1. Sequencing results of 64 selected clones**

|                         | <sup>[a]</sup> Amino acid<br>deletion/change | <sup>[b]</sup> Nucleotide deletion | Frequency             |
|-------------------------|----------------------------------------------|------------------------------------|-----------------------|
| Fluorescent             | M1 $\Delta$ <sup>[c]</sup>                   | 1 atg 3                            | 1                     |
|                         | S2/K3 $\rightarrow$ R                        | 1 ATG AGt aaA GGA 12               | 4                     |
|                         | G4 $\Delta$                                  | 7 AAA gga GAA GAA 18               | 11                    |
|                         | E5 $\Delta$                                  | 10 GGA gaa GAA CTT 21              | 3                     |
|                         | F8/T9 $\rightarrow$ S                        | 19 CTT Ttc aCT GGA 30              | 1                     |
|                         | C48 $\Delta$                                 | 136 TTT ATt tgC ACT 147            | 1                     |
|                         | P75/D76 $\rightarrow$ H                      | 220 TAT Ccg gAT CAT 231            | 1                     |
|                         | P75 $\Delta$                                 | 220 TAT ccg GAT CAT 231            | 1                     |
|                         | E172 $\Delta$                                | 508 AAC ATt gaA GAT 519            | 1                     |
|                         | S175/V176 $\rightarrow$ F                    | 520 GGA Tcc gTT CAA 531            | 1                     |
|                         | A227 $\Delta$                                | 676 ACT GCT gct GGG 687            | 2                     |
|                         | G228 $\Delta$                                | 676 GCT GCt ggG ATT 687            | 4                     |
|                         | G228/I229 $\rightarrow$ V                    | 679 GCT Ggg aTT ACA 690            | 2                     |
|                         | Non-fluorescent                              | G10 $\Delta$                       | 22 TTC ACt ggA GTT 33 |
| D21 $\Delta$            |                                              | 55 GAT GGT gat GTT 60              | 2                     |
| G24 $\Delta$            |                                              | 64 GTT AAT ggg CAC 75              | 1                     |
| E34 $\Delta$            |                                              | 94 GAG GGt gaA GGT 105             | 3                     |
| P58 $\Delta$            |                                              | 166 CCA TGG cca ACA 177            | 1                     |
| P89/E90 $\rightarrow$ Q |                                              | 262 ATG Ccc gAA GGT 273            | 1                     |
| T203 $\Delta$           |                                              | 601 CTG TCG ACA CAA 612            | 1                     |
| Unexpected              |                                              | No deletions                       | NA                    |
|                         | Stop codon                                   | 544 TAtcaA 549                     | 1                     |
|                         | 4 bp deletion                                | NA                                 | 13                    |

[a] Triplet nucleotide deletions can occur in one in-frame codon or two neighboring codons, which may result in amino acid mutations.

[b] Deleted nucleotides are lowercased.

[c] This mutant is not subject to further analysis due to deletion in start codon.
