# Supplementary material for: Structural plasticity of green fluorescent protein to amino acid deletions and fluorescence rescue by folding-enhancing mutations
Source: PubMed Central journal article supplement (PMC4513630; doi:10.1186/s12858-015-0046-5), 2015-07-25
Supplement: 12858_2015_46_MOESM4_ESM.pdf [file 12858_2015_46_MOESM4_ESM.pdf]

**Table S2. Primers used in this study**

| Name                 | Sequence (nucleotides to be mutated are lowercased) | Function                                                                   |
|----------------------|-----------------------------------------------------|----------------------------------------------------------------------------|
| Mly1-5'              | TGCATGCCTGCAGGTCGA <sub>t</sub> TCTAGAGGATCC        | FWD and REV primers for removing <i>Mly</i> I site (234)                   |
| Mly1-3'              | TCGACCTGCAGGCATGCAAGCTTGGCGTAA                      |                                                                            |
| Mly2-5'              | TTATCTACACGACGGGGAG <sub>c</sub> CAGGCAACTAT        | FWD and REV primers for removing <i>Mly</i> I site (2334)                  |
| Mly2-3'              | TCCCCGTCGTGTAGATAACTACGATACGGG                      |                                                                            |
| Mly3-5'              | GTGTCTTACCGGGTTGGA <sub>t</sub> TCAAGACGATAG        | FWD and REV primers for removing <i>Mly</i> I site (2836)                  |
| Mly3-3'              | TCCAACCCGGTAAGACACGACTTATCGCCA                      |                                                                            |
| Mly4-5'              | AACGACCGAGCGCAGCGA <sub>t</sub> TCAGTGAGCGAG        | FWD and REV primers for removing <i>Mly</i> I site (3322)                  |
| Mly4-3'              | TCGCTGCGCTCGGTCGTTCCGGCTGCGGCCA                     |                                                                            |
| F64L-5'              | GGCCAACACTTGTCACTACT <sub>ctt</sub> TCTTATGGTGTT    | FWD and REV primers for introducing F64L mutation                          |
| F64L-3'              | AGTAGTGACAAGTGTTGGCCATGGAACAGGTA                    |                                                                            |
| F64L-5'-2            | ATGGACACTTGTCACTACT <sub>ctt</sub> TCTTATGGTGTT     | FWD and REV primers for introducing F64L into P58Δ                         |
| F64L-3'-2            | AGTAGTGACAAGTGTTCCATGGAACAGGTAGT                    |                                                                            |
| S30R-5'              | ATGGGCACAAATTTTCTGT <sub>Cgc</sub> GGAGAGGGTGAA     | FWD and REV primers for introducing S30R mutation                          |
| S30R-3'              | GACAGAAAATTTGTGCCCATTAACATCACCAT                    |                                                                            |
| C48Δ-5'              | AAACTTACCCTTAAATTTATCACTACTGGAAA                    | FWD and REV primers for introducing C48Δ mutation                          |
| C48Δ-3'              | ATAAATTTAAGGGTAAGTTTTCCGTATGTTGC                    |                                                                            |
| P75/D76<br>→H-5'     | TCAATGCTTTTTCCCGTTATCATCATATGAAAC                   | FWD and REV primers for P75/D76→H mutation                                 |
| P75/D76<br>→H-3'     | GATAACGGGAAAAGCATTGAACACCATAAGAG                    |                                                                            |
| P75Δ-5'              | TTCAATGCTTTTTCCCGTTATGATCATATGAAA                   | FWD and REV primers for introducing P75Δ mutation                          |
| P75Δ-3'              | ATAACGGGAAAAGCATTGAACACCATAAGAGA                    |                                                                            |
| E172Δ-5'             | TTCAAAATTCGCCACAACATAGATGGATCCGT                    | FWD and REV primers for introducing E172Δ mutation                         |
| E172Δ-3'             | ATGTTGTGGCGAATTTTGAAGTTAGCTTTGAT                    |                                                                            |
| S175/V176<br>→F-5'   | CCACAACATTGAAGATGGATTTCAACTAGCAG                    | FWD and REV primers for S175/V176→F mutation                               |
| S175/V176<br>→F-3'   | ATCCATCTTCAATGTTGTGGCGAATTTTGAAG                    |                                                                            |
| S175/V176<br>→F-5'-2 | TCGCCACAACATAGATGGATTTCAACTAGCAG                    | FWD and REV primers for introducing S175/V176→F mutation into E172Δ mutant |
| S175/V176<br>→F-3'-2 | ATCCATCTATGTTGTGGCGAATTTTGAAGTTA                    |                                                                            |
